# Supplementary material for: Gene knock-out chain reaction enables high disruption efficiency of HPV18 E6/E7 genes in cervical cancer cells
Source: PubMed Central journal article supplement — Mol Ther Oncolytics. 2021 Dec 18;24:171–9. doi: 10.1016/j.omto.2021.12.011 (PMC8733033; doi:10.1016/j.omto.2021.12.011), 2021-12-18
Supplement: mmc1.pdf [file mmc1.pdf]

OMTO, Volume 24

## Supplemental information

**Gene knock-out chain reaction enables**

**high disruption efficiency of HPV18**

***E6/E7* genes in cervical cancer cells**

**Rui Tian, Jiashuo Liu, Weiwen Fan, Rui Li, Zifeng Cui, Zhuang Jin, Zhaoyue Huang, Hongxian Xie, Lifang Li, Zheyong Huang, Zheng Hu, Ping Zhou, and Xun Tian**

## Supplementary Tables

**Table S1: Editing type of each clone in the *AAVS1*-GKCR group.**

| Clone Number | Allele-1          | Allele-2 |
|--------------|-------------------|----------|
| GKCR-1       | forward insertion | Indel    |
| GKCR-2       | forward insertion | Indel    |
| GKCR-3       | forward insertion | Indel    |
| GKCR-4       | forward insertion | Indel    |
| GKCR-5       | forward insertion | Indel    |
| GKCR-6       | forward insertion | Indel    |
| GKCR-7       | Indel             | Indel    |
| GKCR-8       | Indel             | Indel    |
| GKCR-9       | Indel             | Indel    |
| GKCR-10      | forward insertion | Indel    |

**Table S2: Editing type of each clone in the AAVS1-GKCR+Control group.**

| Clone Number    | Allel-1           | Allel-2 |
|-----------------|-------------------|---------|
| GKCR+Control-1  | Indel             | Indel   |
| GKCR+Control-2  | forward insertion | Indel   |
| GKCR+Control-3  | Indel             | Indel   |
| GKCR+Control-4  | Indel             | Indel   |
| GKCR+Control-5  | forward insertion | Indel   |
| GKCR+Control-6  | forward insertion | Indel   |
| GKCR+Control-7  | forward insertion | Indel   |
| GKCR+Control-8  | unedited          | Indel   |
| GKCR+Control-9  | Indel             | Indel   |
| GKCR+Control-10 | Indel             | Indel   |
